# 1 Simple Framework for Constructing Functional Spiking Recurrent 2 Neural Networks

3 Robert Kim <sup>1,2,3</sup> \*, Yinghao Li <sup>1</sup>, Terrence J. Sejnowski <sup>1,4,5</sup> \*

4 <sup>1</sup> Computational Neurobiology Laboratory, Salk Institute for Biological Studies, La Jolla, CA  
5 92037, USA

6 <sup>2</sup> Neurosciences Graduate Program, University of California San Diego, La Jolla, CA 92093, USA

7 <sup>3</sup> Medical Scientist Training Program, University of California San Diego, La Jolla, CA 92093,  
8 USA

9 <sup>4</sup> Institute for Neural Computation, University of California San Diego, La Jolla, CA 92093, USA

10 <sup>5</sup> Division of Biological Sciences, University of California San Diego, La Jolla, CA 92093, USA

11 \* Correspondence: rkim@salk.edu (R.K.), terry@salk.edu (T.J.S.)

## 12 Abstract

13 Cortical microcircuits exhibit complex recurrent architectures that possess dynamically rich prop-  
14 erties. The neurons that make up these microcircuits communicate mainly via discrete spikes,  
15 and it is not clear how spikes give rise to dynamics that can be used to perform computationally  
16 challenging tasks. In contrast, continuous models of rate-coding neurons can be trained to perform  
17 complex tasks. Here, we present a simple framework to construct biologically realistic spiking re-  
18 current neural networks (RNNs) capable of learning a wide range of tasks. Our framework involves  
19 training a continuous-variable rate RNN with important biophysical constraints and transferring  
20 the learned dynamics and constraints to a spiking RNN in a one-to-one manner. The proposed  
21 framework introduces only one additional parameter to establish the equivalence between rate  
22 and spiking RNN models. We also study other model parameters related to the rate and spiking  
23 networks to optimize the one-to-one mapping. By establishing a close relationship between rate  
24 and spiking models, we demonstrate that spiking RNNs could be constructed to achieve similar  
25 performance as their counterpart continuous rate networks.

## 26 Introduction

27 Dense recurrent connections common in cortical circuits suggest their important role in computa-  
28 tional processes [1–3]. Network models based on recurrent neural networks (RNNs) of continuous-  
29 variable rate units have been extensively studied to characterize network dynamics underlying  
30 neural computations [4–9]. Methods commonly used to train rate networks to perform cognitive  
31 tasks can be largely classified into three categories: recursive least squares (RLS)-based, gradient-  
32 based, and reward-based algorithms. The First-Order Reduced and Controlled Error (FORCE)  
33 algorithm, which utilizes RLS, has been widely used to train RNNs to produce complex output  
34 signals [5] and to reproduce experimental results [6, 10, 11]. Gradient descent-based methods,  
35 including Hessian-free methods, have been also successfully applied to train rate networks in a  
36 supervised manner and to replicate the computational dynamics observed in networks from be-  
37 having animals [7, 12, 13]. Unlike the previous two categories (i.e. RLS-based and gradient-based  
38 algorithms), reward-based learning methods are more biologically plausible and have been shown  
39 to be as effective in training rate RNNs as the supervised learning methods [14–17]. Even though  
40 these models have been vital in uncovering previously unknown computational mechanisms, con-  
41 tinuous rate networks do not incorporate basic biophysical constraints such as the spiking nature  
42 of biological neurons.

43 Training spiking network models where units communicate with one another via discrete spikes  
44 is more difficult than training continuous rate networks. The non-differentiable nature of spike sig-  
45 nals prevents the use of gradient descent-based methods to train spiking networks directly, although  
46 several differentiable models have been proposed [18, 19]. Due to this challenge, FORCE-based  
47 learning algorithms have been most commonly used to train spiking recurrent networks. While  
48 recent advances have successfully modified and applied FORCE training to construct functional  
49 spike RNNs [8, 20–23], FORCE training is computationally inefficient and unstable when connec-  
50 tivity constraints, including separate populations for excitatory and inhibitory populations (Dale’s  
51 principle) and sparse connectivity patterns, are imposed [21].

52 Due to these limitations, computational capabilities of spiking networks that abide by biological  
53 constraints have been challenging to explore. For instance, it is not clear if spiking RNNs operating  
54 in a purely rate-coding regime can perform tasks as complex as the ones rate RNN models are  
55 trained to perform. If such spiking networks can be constructed, then it would be important to  
56 characterize how much spiking-related noise not present in rate networks affects the performance  
57 of the networks. Establishing the relationship between these two types of RNN models could also

58 serve as a good starting point for designing power-efficient spiking networks that can incorporate  
59 both rate and temporal coding.

60 To address the above questions, we present a computational framework for directly mapping rate  
61 RNNs with basic biophysical constraints to leaky integrate-and-fire (LIF) spiking RNNs without  
62 significantly compromising task performance. Our method introduces only one additional param-  
63 eter to place the spiking RNNs in the same dynamic regime as their counterpart rate RNNs, and  
64 takes advantage of the previously established methods to efficiently optimize network parameters  
65 while adhering to biophysical restrictions. These previously established methods include training  
66 a continuous-variable rate RNN using a gradient descent-based method [24–27] and connectivity  
67 weight matrix parametrization method to impose Dale’s principle [13]. The gradient descent learn-  
68 ing algorithm allowed us to easily optimize many parameters including the connectivity weights  
69 of the network and the synaptic decay time constant for each unit. The weight parametrization  
70 method proposed by Song et al. was utilized to enforce Dale’s principles and additional connectivity  
71 patterns without significantly affecting computational efficiency and network stability [13].

72 Combining these two existing methods with correct parameter values enabled us to directly  
73 map rate RNNs trained with backpropagation to LIF RNNs in a one-to-one manner. The param-  
74 eters critical for mapping to succeed included the network size, the nonlinear activation function  
75 employed for training rate RNNs, and a constant factor for scaling down the connectivity weights  
76 of the trained rate RNNs. Here, we investigated these parameters along with other LIF param-  
77 eters and identified the range of values required for the mapping to be effective. We demonstrate  
78 that when these parameters are set to their optimal values, the LIF models constructed from our  
79 framework can perform the same tasks the rate models are trained to perform equally well.

## 80 Results

81 Here we provide a brief overview of the two types of recurrent neural networks (RNNs) that we  
82 employed throughout this study (more details in Methods): continuous-variable firing rate RNNs  
83 and spiking RNNs. The continuous-variable rate network model consisted of  $N$  rate units whose  
84 firing rates were estimated via a nonlinear input-output transfer function [4, 5]. The model was  
85 governed by the following set of equations:

$$\tau_i^d \frac{dx_i}{dt} = -x_i + \sum_{j=1}^N w_{ij}^{rate} r_j^{rate} + I_{ext} \quad (1)$$

$$r_i^{rate} = \phi(x_i) \quad (2)$$

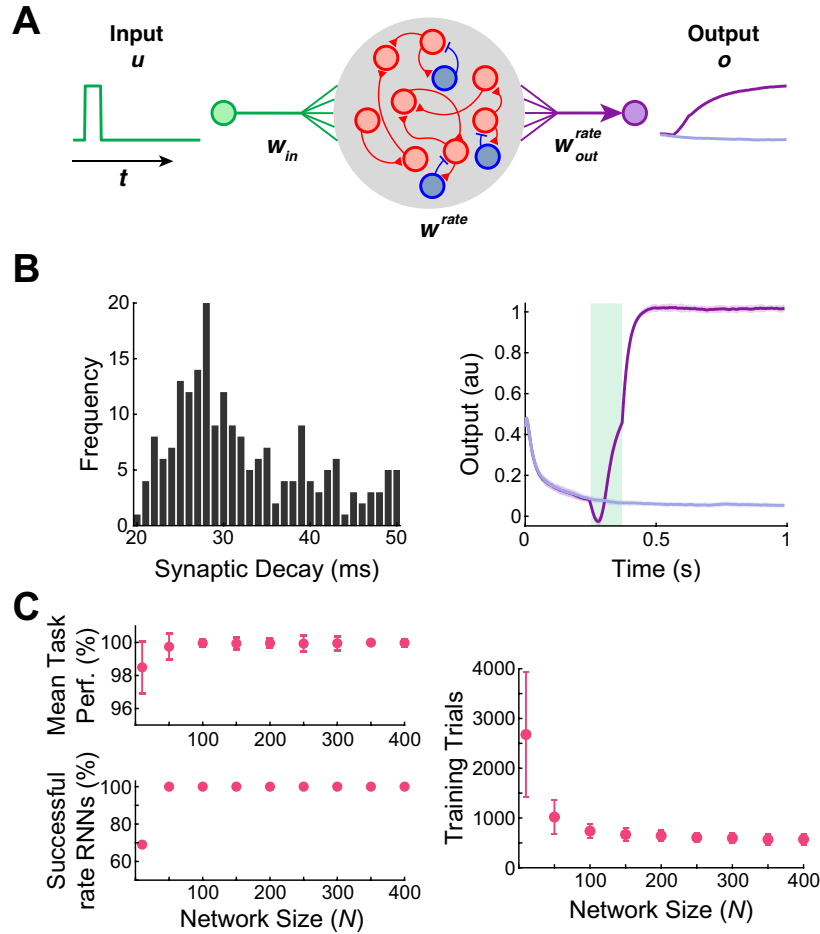

**Fig. 1 | Rate RNNs trained to perform the Go-NoGo task.** **A.** Schematic diagram illustrating a continuous rate RNN model trained to perform the Go-NoGo task. The rate RNN model contained excitatory (red circles) and inhibitory (blue circles) units. **B.** Distribution of the tuned synaptic decay time constants (Mean  $\pm$  SD,  $28.2 \pm 9.4$  ms; left) and the average trained rate RNN task performance (right) from an example rate RNN model. The mean  $\pm$  SD output signals from 50 Go trials (dark purple) and from 50 NoGo trials (light purple) are shown. The green box represents the input stimulus given for the Go trials. The rate RNN contained 200 units (169 excitatory and 31 inhibitory units). **C.** Rate RNNs with different network sizes trained to perform the Go-NoGo task. For each network size, 100 RNNs with random initial conditions were trained. All the networks successfully trained performed the task almost perfectly (range 96–100%; left). As the network size increased, the number of training trials decreased (Mean  $\pm$  SD shown; right).

86 where  $\tau_i^d$  is the synaptic decay time constant for unit  $i$ ,  $x_i$  is the synaptic current variable for unit  
 87  $i$ ,  $w_{ij}^{rate}$  is the synaptic strength from unit  $j$  to unit  $i$ , and  $I_{ext}$  is the external current input to  
 88 unit  $i$ . The firing rate of unit  $i$  ( $r_i^{rate}$ ) is given by applying a nonlinear transfer function ( $\phi(\cdot)$ )  
 89 to the synaptic current variable. Since the firing rates in spiking networks cannot be negative,

90 we chose the activation function for our rate networks to be a non-negative saturating function  
91 (standard sigmoid function) and parametrized the connectivity matrix ( $w_{ij}^{rate} \in W^{rate}$ ) to enforce  
92 Dale’s principle and additional connectivity constraints (see Methods).

93 The second RNN model that we considered was a network composed of  $N$  spiking units.  
94 Throughout this study, we focused on networks of leaky integrate-and-fire (LIF) units whose mem-  
95 brane voltage dynamics were given by:

$$\tau_m \frac{dv_i}{dt} = -v_i + \sum_{j=1}^N w_{ij}^{spk} r_j^{spk} + I_{ext} \quad (3)$$

96 where  $\tau_m$  is the membrane time constant (set to 10 ms throughout this study),  $v_i$  is the membrane  
97 voltage of unit  $i$ ,  $w_{ij}^{spk}$  is the synaptic strength from unit  $j$  to unit  $i$ ,  $r_j^{spk}$  represents the synaptic  
98 filtering of the spike train of unit  $j$ , and  $I_{ext}$  is the external current source. The discrete nature  
99 of  $r_j^{spk}$  (see Methods) has posed a major challenge for directly training spiking networks using  
100 gradient-based supervised learning. Even though the main results presented here are based on LIF  
101 networks, our method can be generalized to quadratic integrate-and-fire (QIF) networks with only  
102 few minor changes to the model parameters (SI Appendix, Table S1).

103 Continuous rate network training was implemented using the open-source software library Ten-  
104 sorFlow in Python, while LIF/QIF network simulations along with the rest of the analyses were  
105 performed in MATLAB.

106 **Training Continuous Rate Networks.** Throughout this study, we used a gradient-descent su-  
107 pervised method, known as Backpropagation Through Time (BPTT), to train rate RNNs to pro-  
108 duce target signals associated with a specific task [13, 24]. The method we employed is similar to  
109 the one used by previous studies ([13, 25, 27]; more details in Methods) with one major difference  
110 in synaptic decay time constants. Instead of assigning a single time constant to be shared by  
111 all the units in a network, our method tunes a synaptic constant for each unit using BPTT (see  
112 Methods). Although tuning of synaptic time constants may not be biologically plausible, this fea-  
113 ture was included to model diverse intrinsic synaptic timescales observed in single cortical neurons  
114 [28–30].

115 We trained rate RNNs of various sizes on a simple task modeled after a Go-NoGo task to  
116 demonstrate our training method (Fig. 1). Each network was trained to produce a positive mean  
117 population activity approaching +1 after a brief input pulse (Fig. 1A). For a trial without an input  
118 pulse (i.e. NoGo trial), the networks were trained to maintain the output signal close to zero. The  
119 units in a rate RNN were sparsely connected via  $W^{rate}$  and received a task-specific input signal

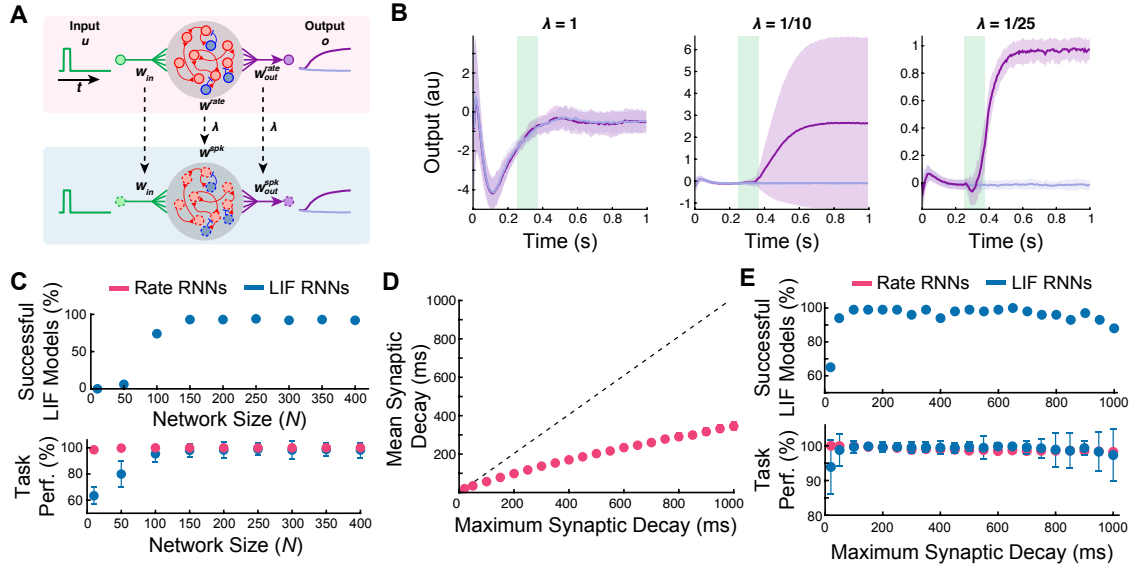

**Fig. 2 | Mapping trained rate RNNs to LIF RNNs for the Go-NoGo task.** **A.** Schematic diagram illustrating direct mapping from a continuous rate RNN model (top) to a spiking RNN model (bottom). The optimized synaptic decay time constants ( $\tau^d$ ) along with the weight parameters ( $W_{in}$ ,  $W^{rate}$ , and  $W_{out}^{rate}$ ) were transferred to a spiking network with LIF units (red and blue circles with a dashed outline). The connectivity and the readout weights were scaled by a constant factor,  $\lambda$ . **B.** LIF RNN performance on the Go-NoGo task without scaling ( $\lambda = 1$ ; left), with insufficient scaling (middle), and with appropriate scaling (right). The network contained 200 units (169 excitatory and 31 inhibitory units). Mean  $\pm$  SD over 50 Go and 50 NoGo trials. **C.** Successfully converted LIF networks and their average task performance on the Go-NoGo task with different network sizes. All the rate RNNs trained in Fig. 1 were converted to LIF RNNs. The network size was varied from  $N = 10$  to 400. **D.** Average synaptic decay values for  $N = 250$  across different maximum synaptic decay constants. **E.** Successfully converted LIF networks and their average task performance on the Go-NoGo task with fixed network size ( $N = 250$ ) and different maximum synaptic decay constants. The maximum synaptic decay constants were varied from 20 ms to 1000 ms.

120 through weights ( $W_{in}$ ) drawn from a normal distribution with zero mean and unit variance. The  
 121 network output ( $o^{rate}$ ) was then computed using a set of linear readout weights:

$$o^{rate}(t) = W_{out}^{rate} \cdot \mathbf{r}^{rate}(t) \quad (4)$$

122 where  $W_{out}^{rate}$  is the readout weights and  $\mathbf{r}^{rate}(t)$  is the firing rate estimates from all the units in  
 123 the network at time  $t$ . The recurrent weight matrix ( $W^{rate}$ ), the readout weights ( $W_{out}^{rate}$ ), and the  
 124 synaptic decay time constants ( $\tau^d$ ) were optimized during training, while the input weight matrix  
 125 ( $W_{in}$ ) stayed fixed (see Methods).

126 The network size ( $N$ ) was varied from 10 to 400 (9 different sizes), and 100 networks with

127 random initializations were trained for each size. For all the networks, the minimum and the  
128 maximum synaptic decay time constants were fixed to 20 ms and 50 ms, respectively. As expected,  
129 the smallest rate RNNs ( $N = 10$ ) took the longest to train, and only 69% of the rate networks  
130 with  $N = 10$  were successfully trained (see SI Appendix for training termination criteria; Fig. 1C).

131 **One-to-One Mapping from Continuous Rate Networks to Spiking Networks.** We de-  
132 veloped a simple procedure that directly maps dynamics of a trained continuous rate RNN to a  
133 spiking RNN in a one-to-one manner.

134 In our framework, the three sets of the weight matrices ( $W_{in}$ ,  $W^{rate}$ , and  $W_{out}^{rate}$ ) along with the  
135 tuned synaptic time constants ( $\tau^d$ ) from a trained rate RNN are transferred to a network of LIF  
136 spiking units. The spiking RNN is initialized to have the same topology as the rate RNN. The input  
137 weight matrix and the synaptic time constants are simply transferred without any modification,  
138 but the recurrent connectivity and the readout weights need to be scaled by a constant factor ( $\lambda$ ) in  
139 order to account for the difference in the firing rate scales between the rate model and the spiking  
140 model (see Methods; Fig. 2A). The effects of the scaling factor is clear in an example LIF RNN  
141 model constructed from a rate model trained to perform the Go-NoGo task (Fig. 2B). With an  
142 appropriate value for  $\lambda$ , the LIF network performed the task with the same accuracy as the rate  
143 network, and the LIF units fired at rates similar to the “rates” of the continuous network units  
144 (SI Appendix, Fig. S1). In addition, the LIF network reproduced the population dynamics of the  
145 rate RNN model as shown by the time evolution of the top three principal components extracted  
146 by the principal component analysis (SI Appendix, Fig. S2).

147 Using the procedure outlined above, we converted all the rate RNNs trained in the previous  
148 section to spiking RNNs. Only the rate RNNs that successfully performed the task (i.e. training  
149 termination criteria met within the first 6000 trials) were converted. Fig. 2C characterizes the  
150 proportion of the LIF networks that successfully performed the Go-NoGo task ( $\geq 95\%$  accuracy;  
151 same threshold used to train the rate models; see SI Appendix) and the average task performance  
152 of the LIF models for each network size group. For each conversion, the scaling factor ( $\lambda$ ) was  
153 determined via a grid search method (see Methods). The LIF RNNs constructed from the small  
154 rate networks ( $N = 10$  and  $N = 50$ ) did not perform the task reliably, but the LIF model became  
155 more robust as the network size increased, and the performance gap between the rate RNNs and  
156 the LIF RNNs was the smallest for  $N = 250$  (Fig. 2C).

157 In order to investigate the effects of the synaptic decay time constants on the mapping ro-  
158 bustness, we trained rate RNNs composed of 250 units ( $N = 250$ ) with different maximum time



159 constants ( $\tau_{max}^d$ ). The minimum time constant ( $\tau_{min}^d$ ) was fixed to 20 ms, while the maximum  
160 constant was varied from 20 ms to 1000 ms. For the first case (i.e.  $\tau_{min}^d = \tau_{max}^d = 20$  ms), the  
161 synaptic decay time constants were not trained and fixed to 20 ms for all the units in a rate RNN.  
162 For each maximum constant value, 100 rate RNNs with different initial conditions were trained,  
163 and only successfully trained rate networks were converted to spiking RNNs. For each maximum  
164 synaptic decay condition, all 100 rate RNNs were successfully trained. As the maximum decay con-  
165 stant increased, the average tuned synaptic decay constants increased sub-linearly (Fig. 2D). For  
166 the shortest synaptic decay time constant considered (20 ms), the average task performance was  
167 the lowest at  $93.91 \pm 7.78\%$ , and 65% of the converted LIF RNNs achieved at least 95% accuracy  
168 (Fig. 2E). The LIF models for the rest of the maximum synaptic decay conditions were robust.  
169 Although this might indicate that tuning of  $\tau^d$  is important for the conversion of rate RNNs to  
170 LIF RNNs, we further investigated the effects of the optimization of  $\tau^d$  in the last section (see  
171 Analysis of the Conversion Method).

172 Our framework also allows seamless integration of additional functional connectivity constraints.  
173 For example, a common cortical microcircuitry motif where somatostatin-expressing interneurons  
174 inhibit both pyramidal and parvalbumin-positive neurons can be easily implemented in our frame-  
175 work (see Methods and SI Appendix, Fig. S3). In addition, Dale's principle is not required for our  
176 framework (SI Appendix, Fig. S4).

177 **LIF networks for context-dependent input integration.** The Go-NoGo task considered in  
178 the previous section did not require complex cognitive computations. In this section, we consider  
179 a more complex task and probe whether spiking RNNs can be constructed from trained rate  
180 networks in a similar fashion. The task considered here is modeled after the context-dependent  
181 sensory integration task employed by Mante et al. [7]. Briefly, Mante et al. trained rhesus monkeys  
182 to integrate inputs from one sensory modality (dominant color or dominant motion of randomly  
183 moving dots) while ignoring inputs from the other modality [7]. A contextual cue was also given to  
184 instruct the monkeys which sensory modality they should attend to. The task required the monkeys  
185 to utilize flexible computations as the same modality can be either relevant or irrelevant depending  
186 on the contextual cue. Previous works have successfully trained continuous rate RNNs to perform  
187 a simplified version of the task and replicated the neural dynamics present in the experimental data  
188 [7, 13, 15]. Using our framework, we constructed the first spiking RNN model to our knowledge  
189 that can perform the task and capture the dynamics observed in the experimental data.

190 For the task paradigm, we adopted a similar design as the one used by the previous modeling



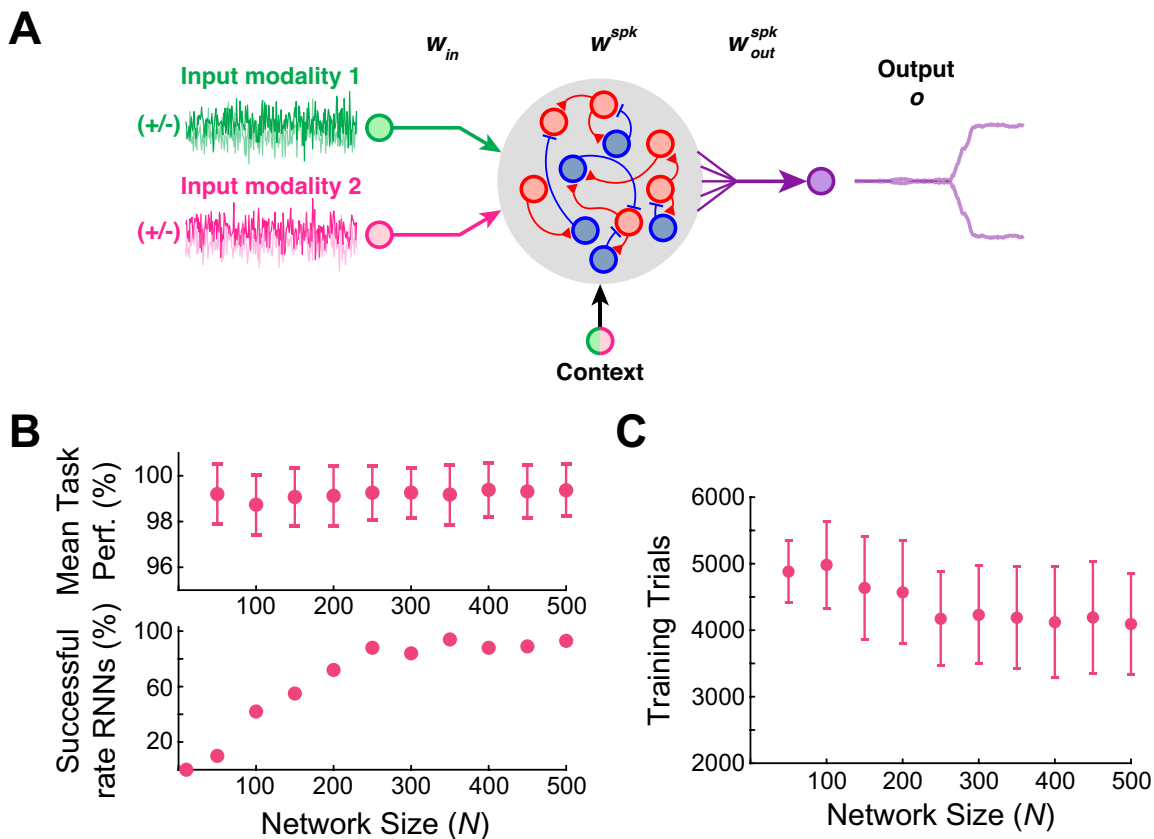

**Fig. 3 | Rate RNNs trained to perform the contextual integration task.** **A.** Diagram illustrating the task paradigm modeled after the context-dependent task used by Mante et al. [7]. Two streams of noisy input signals (green and magenta lines) along with a context signal were delivered to the LIF network. The network was trained to integrate and determine if the mean of the cued input signal (i.e. cued offset value) was positive (“+” choice) or negative (“-” choice). **B.** Rate RNNs with different network sizes trained to perform the contextual integration task. The network size was varied from  $N = 10$  to 500. For each network size, 100 RNNs with random initial conditions were trained. The average task performance (top) and the proportion of the successful rate models (bottom) are shown. A model was successful if its mean task performance was  $\geq 95\%$ . **C.** Average number of training trials required for each network size. As the network size increased, the number of training trials decreased (Mean  $\pm$  SD shown).

191 studies [7, 13, 15]. A network of recurrently connected units received two streams of noisy input  
 192 signals along with a constant-valued signal that encoded the contextual cue (Fig. 3A; see Methods).  
 193 To simulate a noisy sensory input signal, a random Gaussian time-series signal with zero mean and  
 194 unit variance was first generated. Each input signal was then shifted by a positive or negative  
 195 constant (“offset”) to encode evidence toward the (+) or (-) choice, respectively. Therefore, the  
 196 offset value determined how much evidence for the specific choice was represented in the noisy  
 197 input signal. The network was trained to produce an output signal approaching +1 (or -1) if the

198 cued input signal had a positive (or negative) mean. For example, if the cued input signal was  
 199 generated using a positive offset value, then the network should produce an output that approaches  
 200 +1 regardless of the mean of the irrelevant input signal.

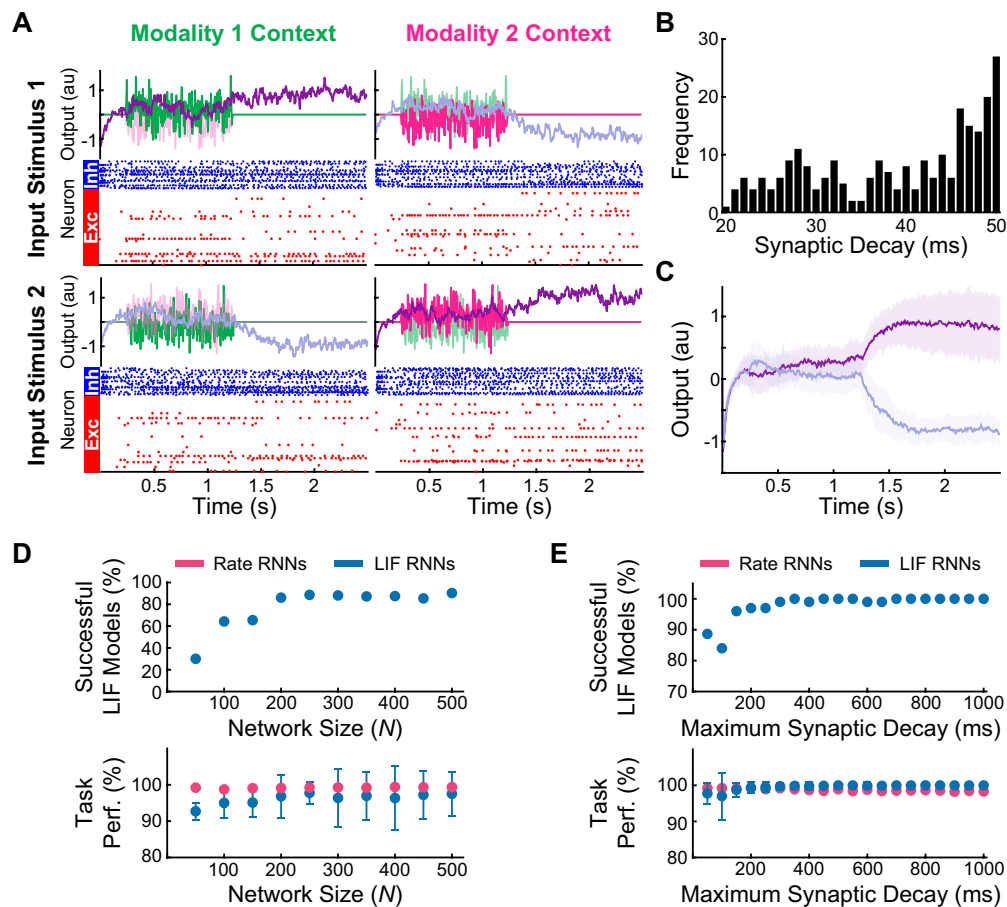

**Fig. 4 | LIF network models constructed to perform the contextual integration task. A.** Example output responses and spike raster plots from a LIF network model for two different input stimuli (rows) and two contexts (columns). The network contained 250 units (188 excitatory and 62 inhibitory units), and the noisy input signals were scaled by 0.5 vertically for better visualization of the network responses (purple lines). **B.** Distribution of the optimized synaptic decay time constants ( $\tau^d$ ) for the example LIF network (Mean  $\pm$  SD,  $38.9 \pm 9.3$  ms). The time constants were limited to range between 20 ms and 50 ms. **C.** Average output responses of the example LIF network. Mean  $\pm$  SD network responses across 100 randomly generated trials shown. **D.** Successfully converted LIF networks and their average task performance across different network sizes. The network size was varied from  $N = 10$  to 500. The rate RNNs trained in Fig. 3 were used. **E.** Successfully converted LIF networks with  $N = 250$  and their average task performance across different maximum synaptic decay constants (varied from 20 ms to 1000 ms).

201 Rate networks with different sizes ( $N = 10, 50, \dots, 450, 500$ ) were trained to perform the task.  
 202 As this is a more complex task compared to the Go-NoGo task considered in the previous section,

203 the number of units and trials required to train rate RNNs was larger than the models trained on  
204 the Go-NoGo task (Fig. 3B and 3C). The synaptic decay time constants were again limited to a  
205 range of 20 ms and 50 ms, and 100 rate RNNs with random initial conditions were trained for each  
206 network size. For the smallest network size ( $N = 10$ ), the rate networks could not be trained to  
207 perform the task within the first 6000 trials (Fig. 3B).

208 Next, all the rate networks successfully trained for the task were transformed into LIF models.  
209 Example output responses along with the distribution of the tuned synaptic decay constants from  
210 a converted LIF model ( $N = 250$ ,  $\tau_{min}^d = 20$  ms,  $\tau_{max}^d = 50$  ms) are shown in Fig. 4A and 4B. The  
211 task performance of the LIF model was 98% and comparable to the rate RNN used to construct the  
212 spiking model (Fig. 4C). In addition, the LIF network manifested population dynamics similar to  
213 the dynamics observed in the group of neurons recorded by Mante et al. [7] and rate RNN models  
214 investigated in previous studies [7, 13, 15]: individual LIF units displayed mixed representation  
215 of the four task variables (modality 1, modality 2, network choice, and context; see SI Appendix,  
216 Fig. S5A), and the network revealed the characteristic line attractor dynamics (SI Appendix,  
217 Fig. S5B).

218 Similar to the spiking networks constructed for the Go-NoGo task, the LIF RNNs performed  
219 the input integration task more accurately as the network size increased (Fig. 4D). Next, the  
220 network size was fixed to  $N = 250$  and  $\tau_{max}^d$  was gradually increased from 20 ms to 1000 ms. For  
221  $\tau_{min}^d = \tau_{max}^d = 20$  ms, all 100 rate networks failed to learn the task within the first 6000 trials.  
222 The conversion from the rate models to the LIF models did not lead to significant loss in task  
223 performance for all the other maximum decay constant values considered (Fig. 4E).

224 **Analysis of the Conversion Method.** Previous sections illustrated that our framework for  
225 converting rate RNNs to LIF RNNs is robust as long as the network size is not too small ( $N \geq 200$ ),  
226 and the optimal size was  $N = 250$  for both tasks. When the network size is too small, it is harder  
227 to train rate RNNs and the rate models successfully trained do not reliably translate to spiking  
228 networks (Fig. 2D and Fig. 4D). In this section, we further investigate the relationship between rate  
229 and LIF RNN models and characterize other parameters crucial for the conversion to be effective.

230 **Training synaptic decay time constants.** As shown in Fig. 5, training the synaptic decay  
231 constants for all the rate units is not required for the conversion to work. Rate RNNs (100 models  
232 with different initial conditions) with the synaptic decay time constant fixed to 35 ms (average  $\tau^d$   
233 value for the networks trained with  $\tau_{min}^d = 20$  ms and  $\tau_{max}^d = 50$  ms) were trained on the Go-NoGo  
234 task and converted to LIF RNNs (Fig. 5). The task performance of these LIF networks was not

235 significantly different from the performance of the spiking models with optimized synaptic decay  
236 constants bounded between 20 ms and 50 ms. The number of the successful LIF models with the  
237 fixed synaptic decay constant was also comparable to the number of the successful LIF models  
238 with the tuned decay constants (Fig. 5).

239 **Other LIF parameters.** We also probed how LIF model parameters affected our framework.  
240 More specifically, we focused on the refractory period and synaptic filtering. The LIF models  
241 constructed in the previous sections used an absolute refractory period of 2 ms and a double expo-  
242 nential synaptic filter (see Methods). Rate models ( $N = 250$  and  $\tau_{max}^d = 100$  ms) trained on the  
243 sensory integration task were converted to LIF networks with different values of the refractory pe-  
244 riod. As the refractory period became longer, the task performance of the spiking RNNs decreased  
245 rapidly (Fig. 6A). When the refractory period was set to 0 ms, the LIF RNNs still performed  
246 the integration task with a moderately high average accuracy ( $92.8 \pm 14.3\%$ ), but the best task  
247 performance was achieved when the refractory period was set to 2 ms (average performance,  $97.0$   
248  $\pm 6.6\%$ ; Fig. 6A inset).

249 We also investigated how different synaptic filters influenced the mapping process. We first fixed  
250 the refractory period to its optimal value (2 ms) and constructed 100 LIF networks ( $N = 250$ ) for  
251 the integration task using a double synaptic filter (see Methods; Fig. 6B light blue). Next, the  
252 synaptic filter was changed to the following single exponential filter:

$$\tau_i^d \frac{dr_i^{spk}}{dt} = -r_i^{spk} + \sum_{t_i^k < t} \delta(t - t_i^k)$$

253 where  $r_i^{spk}$  represents the filtered spike train of unit  $i$  and  $t_i^k$  refers to the  $k$ -th spike emitted by unit  
254  $i$ . The task performance of the LIF networks with the above single exponential synaptic filter was  
255  $95.7 \pm 7.3\%$ , and it was not significantly different from the performance of the double exponential  
256 synaptic LIF models ( $97.0 \pm 6.6\%$ ; Fig. 6B).

257 **Initial connectivity weight scaling.** We considered the role of the connectivity weight initial-  
258 ization in our framework. In the previous sections, the connectivity weights ( $W^{rate}$ ) of the rate  
259 networks were initialized as random, sparse matrices with zero mean and a standard deviation of  
260  $g/\sqrt{N \cdot P_c}$ , where  $g = 1.5$  is the gain term that controls the dynamic regime of the networks and  
261  $P_c = 0.20$  is the initial connectivity probability (see Methods). Previous studies have shown that  
262 rate networks operating in a high gain regime ( $g > 1.0$ ) produce chaotic spontaneous trajectories,  
263 and this rich dynamics can be harnessed to perform complex computations [6, 11]. By varying

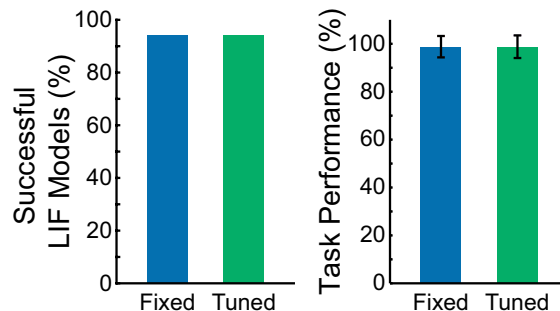

**Fig. 5 | Optimizing synaptic decay constants is not required for conversion of rate RNNs.**

The Go-NoGo task performance of the LIF RNNs constructed from the rate networks with a fixed synaptic constant ( $\tau^d = 35$  ms; blue) was not significantly different from the performance of the LIF RNNs with tuned synaptic decay time constants ( $\tau_{min}^d = 20$  ms,  $\tau_{max}^d = 50$  ms; green).

264 the gain term, we determined if highly chaotic initial dynamics were required for successful con-  
265 version. We considered six different gain terms ranging from 0.5 to 3.5, and for each gain term,  
266 we constructed 100 LIF RNNs (from 100 rate RNNs with random initial conditions; Fig. 6C) to  
267 perform the contextual integration task. The LIF models performed the task equally well across  
268 all the gain terms considered (no statistical significance detected).

269 **Transfer function.** One of the most important factors that determines whether rate RNNs can  
270 be mapped to LIF RNNs in a one-to-one manner is the nonlinear transfer function used in the  
271 rate models. We considered three non-negative transfer functions commonly used in the machine  
272 learning field to train rate RNNs on the Go-NoGo task: sigmoid, rectified linear, and softplus  
273 functions (Fig. 7A; see SI Appendix). For each transfer function, 100 rate models ( $N = 250$  and  
274  $\tau_{max}^d = 50$  ms) were trained. Although all 300 rate models were trained to perform the task almost  
275 perfectly (Fig. 7B), the average task performance and the number of successful LIF RNNs were  
276 highest for the rate models trained with the sigmoid transfer function (Fig. 7C). None of the rate  
277 models trained with the rectified linear transfer function could be successfully mapped to LIF  
278 models, while the spiking networks constructed from the rate models trained with the softplus  
279 function were not robust and produced incorrect responses (SI Appendix, Fig. S6).

## 280 Discussion

281 In the current study, we presented a simple framework that harnesses the dynamics of trained  
282 continuous rate network models to produce functional spiking RNN models. We identified a set  
283 of parameters required to directly transform trained rate RNNs to LIF models, thus establishing  
284 a one-to-one correspondence between these two model types. Despite of additional spiking-related

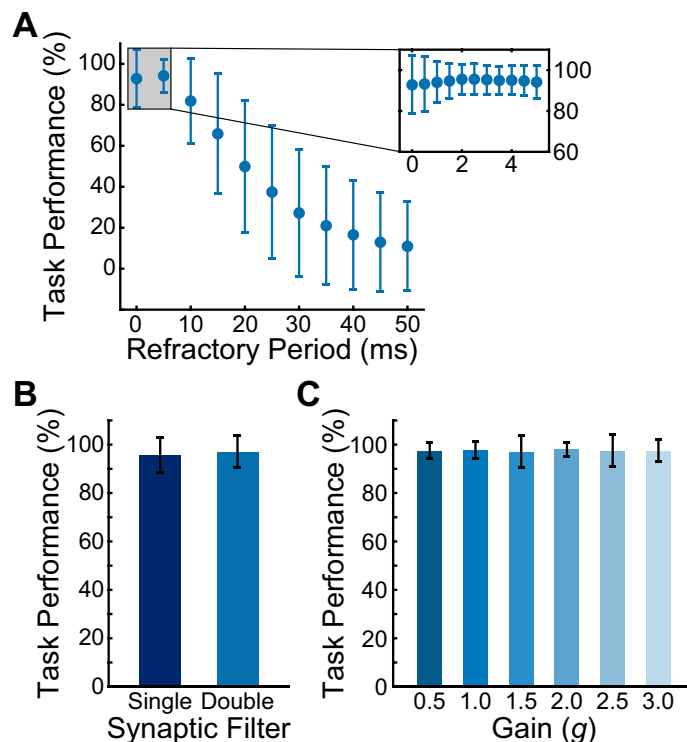

**Fig. 6 | Effects of the refractory period, synaptic filter, and rate RNN connectivity weight initialization.** **A.** Average contextual integration task performance of the LIF network models ( $N = 250$ ) with different refractory period values. The refractory period was varied from 0 ms (i.e. no refractory period) to 50 ms. The inset shows the average task performance across finer changes in the refractory period. Mean  $\pm$  SD shown. **B.** Average contextual integration task performance of the LIF network models ( $N = 250$  and refractory period = 2 ms) with the single exponential synaptic filter (dark blue) and the double exponential synaptic filter (light blue). Mean  $\pm$  SD shown. **C.** Average contextual integration task performance of the LIF network models ( $N = 250$ , refractory period = 2 ms, and double exponential synaptic filter) with different connectivity gain initializations. Mean  $\pm$  SD shown.

285 parameters, surprisingly only a single parameter (i.e. scaling factor) was required for LIF RNN  
286 models to closely mimic their counterpart rate models. Furthermore, this framework can flexibly  
287 impose functional connectivity constraints and heterogeneous synaptic time constants.

288 We investigated and characterized the effects of several model parameters on the stability of  
289 the transfer learning from rate models to spiking models. The parameters critical for the mapping  
290 to be robust included the network size, choice of activation function for training rate RNNs, and  
291 a constant factor to scale down the connectivity weights of the trained rate networks. Although  
292 the softplus and rectified linear activation functions are popular for training deep neural networks,  
293 we demonstrated that the rate networks trained with these functions do not translate robustly to

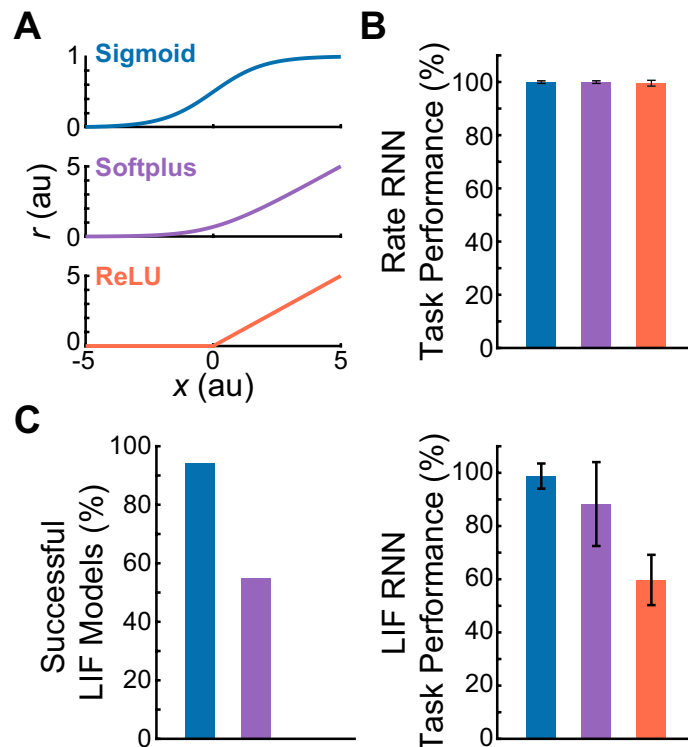

**Fig. 7 | Comparison of the LIF RNNs derived from the rate RNNs trained with three non-negative activation functions.** **A.** Three non-negative transfer functions were considered: sigmoid, softplus, and rectified linear (ReLU) functions. **B.** All 300 rate RNNs (100 networks per activation function) were successfully trained to perform the Go-NoGo task. **C.** Of the 100 sigmoid LIF networks constructed, 94 networks successfully performed the task. The conversion rates for the softplus and ReLU LIF models were 55% and 0%, respectively. Mean  $\pm$  SD task performance:  $98.8 \pm 4.7\%$  (sigmoid),  $88.3 \pm 15.8\%$  (softplus), and  $59.7 \pm 9.5\%$  (ReLU).

294 LIF RNNs (Fig. 7). On the other hand, the rate models trained with the sigmoid function were  
295 transformed to LIF models with high fidelity.

296 Another important parameter was the constant scaling factor used to scale  $W^{rate}$  and  $W_{out}^{rate}$   
297 before transferring them to LIF networks. When the scaling factor was set to its optimal value  
298 (found via grid search), the LIF units behaved like their counterpart rate units, and the spiking  
299 networks performed the tasks the rate RNNs were trained to perform (Fig. 2). Another parameter  
300 that affected the reliability of the conversion was the refractory period parameter of the LIF network  
301 models. The LIF performance was optimal when the refractory was set to 2 ms (Fig. 6A). Training  
302 the synaptic decay time constants, choice of synaptic filter (between single and double exponential  
303 filter), and connectivity weight initialization did not affect the mapping procedure (Fig. 5 and  
304 Fig. 6B–C).



305 The type of approach used in this study (i.e. conversion of a rate network to a spiking net-  
306 work) has been previously employed in neuromorphic engineering to construct power-efficient deep  
307 spiking networks [31–36]. These studies mainly employed feedforward multi-layer networks or con-  
308 volutional neural networks aimed to accurately classify input signals or images without placing too  
309 much emphasis on biophysical limitations. The overarching goal in these studies was to maximize  
310 task performance while minimizing power consumption and computational cost. On the other  
311 hand, the main aim of the present study was to construct spiking recurrent network models that  
312 abide by important biological constraints in order to relate emerging mechanisms and dynamics  
313 to experimentally observed findings. To this end, we have carefully designed our continuous rate  
314 RNNs to include several biological features. These include (1) recurrent architectures, (2) sparse  
315 connectivity that respects Dale’s principle, and (3) heterogeneous synaptic decay time constants.

316 For constructing spiking RNNs, recent studies have proposed methods that built on the FORCE  
317 method to train spiking RNNs [8, 20–22]. Conceptually, our work is most similar to the work by  
318 DePasquale et al. [21]. The method developed by DePasquale et al. [21] also relies on mapping  
319 a trained continuous-variable rate RNN to a spiking RNN model. However, the rate RNN model  
320 used in their study was designed to provide dynamically rich auxiliary basis functions meant to be  
321 distributed to overlapping populations of spiking units. Due to this reason, the relationship between  
322 their rate and spiking models is rather complex, and it is not straightforward to impose functional  
323 connectivity constraints on their spiking RNN model. An additional procedure was introduced  
324 to implement Dale’s principle, but this led to more fragile spiking networks with considerably  
325 increased training time [21]. The one-to-one mapping between rate and spiking networks employed  
326 in our method solved these problems without sacrificing network stability and computational cost:  
327 biophysical constraints that we wanted to incorporate into our spiking model were implemented in  
328 our rate network model first and then transferred to the spiking model.

329 While our framework incorporated the basic yet important biological constraints, there are  
330 several features that are also not biologically realistic in our models. The gradient-descent method  
331 employed to tune the rate model parameters, including the connectivity weights and the synaptic  
332 decay time constants, in a supervised manner is not biologically plausible. Although tuning of  
333 the synaptic time constants is not realistic and has not been observed experimentally, previous  
334 studies have underscored the importance of the diversity of synaptic time scales both *in silico*  
335 and *in vivo* [8, 29, 30]. In addition, other works have validated and uncovered neural mechanisms  
336 observed in experimental settings using RNN models trained with backpropagation [7, 13, 37], thus

337 highlighting that a network model can be biologically plausible even if it was constructed using  
338 non-biological means. Another limitation of our method is the lack of temporal coding in our LIF  
339 models. Since our framework involves rate RNNs that operate in a rate coding scheme, the spiking  
340 RNNs that our framework produces also employ rate coding by nature. Previous studies have  
341 shown that spike-coding can improve spiking efficiency and enhance network stability [20, 38, 39],  
342 and recent studies emphasized the importance of precise spike coordination without modulations  
343 in firing rates [40, 41]. Lastly, our framework does not model nonlinear dendritic processes which  
344 have been shown to play a significant role in efficient input integration and flexible information  
345 processing [22, 42, 43]. Incorporating nonlinear dendritic processes into our platform using the  
346 method proposed by Thalmeier et al. [22] will be an interesting next step to further investigate  
347 the role of dendritic computation in information processing.

348 In summary, we provide an easy-to-use platform that converts a continuous recurrent network  
349 model with basic biological constraints to a spiking model. The tight relationship between rate  
350 and LIF RNN models under certain parameter values suggests that spiking networks could be  
351 put together to perform complex tasks traditionally employed to train and study continuous rate  
352 networks. Future work needs to focus on why and how such a tight relationship emerges. The  
353 framework along with the findings presented in this study lays the groundwork for discovering  
354 new principles on how neural circuits solve computational problems with discrete spikes and for  
355 constructing more power efficient spiking networks. Extending our platform to incorporate other  
356 commonly used neural network architectures could help design biologically plausible deep learning  
357 networks that operate at a fraction of the power consumption required for current deep neural  
358 networks.

## 359 References

- 360 [1] Goldman-Rakic, P. Cellular basis of working memory. *Neuron*. **14**, 477 – 485. (1995).
- 361 [2] Felsen, G., song Shen, Y., Yao, H., Spor, G., Li, C. & Dan, Y. Dynamic modification of cortical  
362 orientation tuning mediated by recurrent connections. *Neuron*. **36**, 945 – 954. (2002).
- 363 [3] Wang, X.-J. Decision making in recurrent neuronal circuits. *Neuron*. **60**, 215–234. (2008).
- 364 [4] Sompolinsky, H., Crisanti, A. & Sommers, H. J. Chaos in random neural networks. *Phys. Rev. Lett.*  
365 **61**, 259–262 (1988).
- 366 [5] Sussillo, D. & Abbott, L. Generating coherent patterns of activity from chaotic neural networks.  
367 *Neuron*. **63**, 544 – 557 (2009).
- 368 [6] Laje, R. & Buonomano, D. V. Robust timing and motor patterns by taming chaos in recurrent neural  
369 networks. *Nature Neuroscience*. **16**, 925–933 (2013).
- 370 [7] Mante, V., Sussillo, D., Shenoy, K. V. & Newsome, W. T. Context-dependent computation by recurrent  
371 dynamics in prefrontal cortex. *Nature*. **503**, 78–84 (2013).
- 372 [8] Kim, C. M. & Chow, C. C. Learning recurrent dynamics in spiking networks. *eLife*. **7**, e37124 (2018).
- 373 [9] Mastrogiuseppe, F. & Ostojic, S. Linking connectivity, dynamics, and computations in low-rank recur-  
374 rent neural networks. *Neuron*. **99**, 609–623 (2018).
- 375 [10] Enel, P., Procyk, E., Quilodran, R. & Dominey, P. F. Reservoir computing properties of neural dynamics  
376 in prefrontal cortex. *PLOS Computational Biology*. **12**, e1004967 (2016).
- 377 [11] Rajan, K., Harvey, C. D. & Tank, D. W. Recurrent network models of sequence generation and memory.  
378 *Neuron*. **90**, 128 – 142 (2016).
- 379 [12] Barak, O., Sussillo, D., Romo, R., Tsodyks, M. & Abbott, L. From fixed points to chaos: Three models  
380 of delayed discrimination. *Progress in Neurobiology*. **103**, 214 – 222 (2013).
- 381 [13] Song, H. F., Yang, G. R. & Wang, X.-J. Training excitatory-inhibitory recurrent neural networks for  
382 cognitive tasks: A simple and flexible framework. *PLOS Computational Biology*. **12**, e1004792 (2016).
- 383 [14] Song, H. F., Yang, G. R. & Wang, X.-J. Reward-based training of recurrent neural networks for  
384 cognitive and value-based tasks. *eLife*. **6**, e21492 (2017).
- 385 [15] Miconi, T. Biologically plausible learning in recurrent neural networks reproduces neural dynamics  
386 observed during cognitive tasks. *eLife*. **6**, e20899 (2017).
- 387 [16] Wang, J. X., Kurth-Nelson, Z., Kumaran, D., Tirumala, D., Soyer, H., Leibo, J. Z., Hassabis, D. &  
388 Botvinick, M. Prefrontal cortex as a meta-reinforcement learning system. *Nature Neuroscience*. **21**,  
389 860–868. (2018).
- 390 [17] Zhang, Z., Cheng, Z., Lin, Z., Nie, C. & Yang, T. A neural network model for the orbitofrontal cortex  
391 and task space acquisition during reinforcement learning. *PLOS Computational Biology*. **14**, 1–24.  
392 (2018).
- 393 [18] Huh, D. & Sejnowski, T. J. Gradient descent for spiking neural networks. In Bengio, S., Wallach, H.,  
394 Larochelle, H., Grauman, K., Cesa-Bianchi, N. & Garnett, R., editors, *Advances in Neural Information*  
395 *Processing Systems 31*. pages 1433–1443 (2018).

- 396 [19] Lee, J. H., Delbruck, T. & Pfeiffer, M. Training deep spiking neural networks using backpropagation.  
397 *Frontiers in Neuroscience*. **10**, 508 (2016).
- 398 [20] Abbott, L. F., DePasquale, B. & Memmesheimer, R.-M. Building functional networks of spiking model  
399 neurons. *Nature Neuroscience*. **19**, 350–355 (2016).
- 400 [21] DePasquale, B., Churchland, M. M. & Abbott, L. F. Using firing-rate dynamics to train recurrent  
401 networks of spiking model neurons. Preprint at arXiv <https://arxiv.org/abs/1601.07620> (2016).
- 402 [22] Thalmeier, D., Uhlmann, M., Kappen, H. J. & Memmesheimer, R.-M. Learning universal computations  
403 with spikes. *PLOS Computational Biology*. **12**, e1004895 (2016).
- 404 [23] Nicola, W. & Clopath, C. Supervised learning in spiking neural networks with force training. *Nature*  
405 *Communications*. **8**, 2208 (2017).
- 406 [24] Werbos, P. J. Backpropagation through time: what it does and how to do it. *Proceedings of the IEEE*.  
407 **78**, 1550–1560 (1990).
- 408 [25] Martens, J. & Sutskever, I. Learning recurrent neural networks with hessian-free optimization. In  
409 *Proceedings of the 28th International Conference on International Conference on Machine Learning*.  
410 ICML'11. pages 1033–1040. USA. (2011). Omnipress.
- 411 [26] Pascanu, R., Mikolov, T. & Bengio, Y. On the difficulty of training recurrent neural networks. In  
412 *Proceedings of the 30th International Conference on International Conference on Machine Learning -*  
413 *Volume 28*. ICML'13. pages III–1310–III–1318. (2013).
- 414 [27] Bengio, Y., Boulanger-Lewandowski, N. & Pascanu, R. Advances in optimizing recurrent networks.  
415 In *2013 IEEE International Conference on Acoustics, Speech and Signal Processing*. pages 8624–8628.  
416 (2013).
- 417 [28] Stokes, M. G., Kusunoki, M., Sigala, N., Nili, H., Gaffan, D. & Duncan, J. Dynamic coding for cognitive  
418 control in prefrontal cortex. *Neuron*. **78**, 364–375. (2013).
- 419 [29] Wasmuht, D. F., Spaak, E., Buschman, T. J., Miller, E. K. & Stokes, M. G. Intrinsic neuronal dynamics  
420 predict distinct functional roles during working memory. *Nature Communications*. **9**, 3499 (2018).
- 421 [30] Cavanagh, S. E., Towers, J. P., Wallis, J. D., Hunt, L. T. & Kennerley, S. W. Reconciling persistent  
422 and dynamic hypotheses of working memory coding in prefrontal cortex. *Nature Communications*. **9**.  
423 (2018).
- 424 [31] Cao, Y., Chen, Y. & Khosla, D. Spiking deep convolutional neural networks for energy-efficient object  
425 recognition. *Int. J. Comput. Vision*. **113**, 54–66. (2015).
- 426 [32] Diehl, P. U., Neil, D., Binas, J., Cook, M., Liu, S. & Pfeiffer, M. Fast-classifying, high-accuracy spiking  
427 deep networks through weight and threshold balancing. In *2015 International Joint Conference on*  
428 *Neural Networks (IJCNN)*. pages 1–8. (2015).
- 429 [33] Diehl, P. U., Zarella, G., Cassidy, A., Pedroni, B. U. & Neftci, E. Conversion of artificial recurrent  
430 neural networks to spiking neural networks for low-power neuromorphic hardware. In *2016 IEEE*  
431 *International Conference on Rebooting Computing (ICRC)*. pages 1–8. (2016).
- 432 [34] Hunsberger, E. & Eliasmith, C. Training spiking deep networks for neuromorphic hardware. *CoRR*.

- 433 abs/1611.05141. (2016).
- 434 [35] Rueckauer, B., Lungu, I.-A., Hu, Y. & Pfeiffer, M. Theory and tools for the conversion of analog to  
435 spiking convolutional neural networks. (2016).
- 436 [36] Sengupta, A., Ye, Y., Wang, R., Liu, C. & Roy, K. Going deeper in spiking neural networks: Vgg and  
437 residual architectures. *Frontiers in Neuroscience*. **13**, 95. (2019).
- 438 [37] Chaisangmongkon, W., Swaminathan, S. K., Freedman, D. J. & Wang, X.-J. Computing by robust  
439 transience: How the fronto-parietal network performs sequential, category-based decisions. *Neuron*.  
440 **93**, 1504–1517. (2017).
- 441 [38] Denève, S. & Machens, C. K. Efficient codes and balanced networks. *Nature Neuroscience*. **19**, 375–382.  
442 (2016).
- 443 [39] Alemi, A., Machens, C. K., Denève, S. & Slotine, J.-J. E. Learning nonlinear dynamics in efficient,  
444 balanced spiking networks using local plasticity rules. In *AAAI*. (2018).
- 445 [40] Zick, J. L., Blackman, R. K., Crowe, D. A., Amirikian, B., DeNicola, A. L., Netoff, T. I. & Chafee,  
446 M. V. Blocking NMDAR disrupts spike timing and decouples monkey prefrontal circuits: Implications  
447 for activity-dependent disconnection in schizophrenia. *Neuron*. **98**, 1243–1255 (2018).
- 448 [41] Shahidi, N., Andrei, A. R., Hu, M. & Dragoi, V. High-order coordination of cortical spiking activity  
449 modulates perceptual accuracy. *Nature Neuroscience*. **22**, 1148–1158. (2019).
- 450 [42] Ujfalussy, B. B., Makara, J. K., Branco, T. & Lengyel, M. Dendritic nonlinearities are tuned for efficient  
451 spike-based computations in cortical circuits. *eLife*. **4**, e10056. (2015).
- 452 [43] Yang, G. R., Murray, J. D. & Wang, X.-J. A dendritic disinhibitory circuit mechanism for pathway-  
453 specific gating. *Nature Communications*. **7**, 12815 (2016).

## 454 **Acknowledgements**

455 We are grateful to Ben Huh, Gerald Pao, Jason Fleischer, Debha Amatya, Yusi Chen, and Ben  
456 Tsuda for helpful discussions and feedback on the manuscript. We also thank Jorge Aldana for  
457 assistance with computing resources. This work was funded by the National Institute of Mental  
458 Health (F30MH115605-01A1 to R.K.), Harold R. Schwalenberg Medical Scholarship (R.K.), and  
459 Burnand-Partridge Foundation Scholarship (R.K.). We also gratefully acknowledge the support of  
460 NVIDIA Corporation with the donation of the Quadro P6000 GPU used for this research. The  
461 funders had no role in study design, data collection and analysis, decision to publish, or preparation  
462 of the manuscript.

## 463 **Author contributions**

464 R.K. and T.J.S. designed the study and wrote the manuscript. R.K. and Y.L. performed model  
465 analyses and simulations.

## 466 **Declaration of interests**

467 The authors declare no competing interests.

## 468 Methods

469 The implementation of our framework and the codes to generate all the figures in this work are  
470 available at <https://github.com/rkim35/spikeRNN>. The repository also contains implementation  
471 of other tasks including autonomous oscillation and exclusive OR (XOR) tasks.

472 All the trained models used in the present study are available from the corresponding authors  
473 upon reasonable request.

474 **Continuous rate network structure.** The continuous rate RNN model contains  $N$  units recur-  
475 rently connected to one another. The dynamics of the model is governed by

$$\tau^d \frac{d\mathbf{x}}{dt} = -\mathbf{x} + W^{rate} \mathbf{r}^{rate} + \mathbf{I}_{ext} \quad (5)$$

476 where  $\tau^d \in \mathbb{R}^{1 \times N}$  corresponds to the synaptic decay time constants for the  $N$  units in the network  
477 (see **Training details** on how these are initialized and optimized),  $\mathbf{x} \in \mathbb{R}^{1 \times N}$  is the synaptic current  
478 variable,  $W^{rate} \in \mathbb{R}^{N \times N}$  is the synaptic connectivity matrix, and  $\mathbf{r}^{rate} \in \mathbb{R}^{1 \times N}$  is the output of the  
479 units. The output of each unit, which can be interpreted as the firing rate estimate, is obtained  
480 by applying a nonlinear transfer function to the synaptic current variable ( $\mathbf{x}$ ) elementwise:

$$\mathbf{r}^{rate} = \phi(\mathbf{x})$$

481 We use a standard logistic sigmoid function for the transfer function to constrain the firing rates  
482 to be non-negative:

$$\phi(\mathbf{x}) = \frac{1}{1 + \exp(-\mathbf{x})} \quad (6)$$

483 The connectivity weight matrix ( $W^{rate}$ ) is initialized as a random, sparse matrix drawn from a  
484 normal distribution with zero mean and a standard deviation of  $1.5/\sqrt{N \cdot P_c}$  where  $P_c = 0.20$  is  
485 the initial connectivity probability.

486 The external currents ( $\mathbf{I}_{ext}$ ) include task-specific input stimulus signals (see SI Appendix) along  
487 with a Gaussian white noise variable:

$$\mathbf{I}_{ext} = W_{in} \mathbf{u} + \mathcal{N}(0, 0.01)$$

488 where the time-varying stimulus signals ( $\mathbf{u} \in \mathbb{R}^{N_{in} \times 1}$ ) are fed to the network via  $W_{in} \in \mathbb{R}^{N \times N_{in}}$ ,  
489 a Gaussian random matrix with zero mean and unit variance.  $N_{in}$  corresponds to the number of  
490 input signals associated with a specific task, and  $\mathcal{N}(0, 0.01) \in \mathbb{R}^{N \times 1}$  represents a Gaussian random  
491 noise with zero mean and variance of 0.01.



492 The output of the rate RNN at time  $t$  is computed as a linear readout of the population activity:

$$o^{rate}(t) = W_{out}^{rate} \mathbf{r}^{rate}(t)$$

493 where  $W_{out}^{rate} \in \mathbb{R}^{1 \times N}$  refers to the readout weights.

494 Eq. (5) is discretized using the first-order Euler approximation method:

$$\begin{aligned} \mathbf{x}_t = & \left(1 - \frac{\Delta t}{\tau^d}\right) \mathbf{x}_{t-1} + \frac{\Delta t}{\tau^d} (W^{rate} \mathbf{r}_{t-1}^{rate} + W_{in} \mathbf{u}_{t-1}) \\ & + \mathcal{N}(0, 0.01) \end{aligned}$$

495 where  $\Delta t = 5$  ms is the discretization time step size used throughout this study.

496 **Spiking network structure.** For our spiking RNN model, we considered a network of leaky  
497 integrate-and-fire (LIF) units governed by

$$\tau_m \frac{d\mathbf{v}}{dt} = -\mathbf{v} + W^{spk} \mathbf{r}^{spk} + \mathbf{I}_{ext} \quad (7)$$

498 In the above equation,  $\tau_m = 10$  ms is the membrane time constant shared by all the LIF units,  
499  $\mathbf{v} \in \mathbb{R}^{1 \times N}$  is the membrane voltage variable,  $W^{spk} \in \mathbb{R}^{N \times N}$  is the recurrent connectivity matrix,  
500 and  $\mathbf{r}^{spk} \in \mathbb{R}^{1 \times N}$  represents the spike trains filtered by a synaptic filter. Throughout the study,  
501 the double exponential synaptic filter was used to filter the presynaptic spike trains:

$$\begin{aligned} \frac{dr_i^{spk}}{dt} &= -\frac{r_i^{spk}}{\tau_i^d} + s_i \\ \frac{ds_i}{dt} &= -\frac{s_i}{\tau_r} + \frac{1}{\tau_r \tau_i^d} \sum_{t_i^k < t} \delta(t - t_i^k) \end{aligned}$$

502 where  $\tau_r = 2$  ms and  $\tau_i^d$  refer to the synaptic rise time and the synaptic decay time for unit  $i$ ,  
503 respectively. The synaptic decay time constant values ( $\tau_i^d \in \tau^d$ ) are trained and transferred to our  
504 LIF RNN model (see **Training details**). The spike train produced by unit  $i$  is represented as a  
505 sum of Dirac  $\delta$  functions, and  $t_i^k$  refers to the  $k$ -th spike emitted by unit  $i$ .

506 The external current input ( $\mathbf{I}_{ext}$ ) is similar to the one used in our continuous model (see **Con-**  
507 **tinuous rate network structure**). The only difference is the addition of a constant background  
508 current set near the action potential threshold (see below).

509 The output of our spiking model at time  $t$  is given by

$$o^{spk}(t) = W_{out}^{spk} \mathbf{r}^{spk}(t)$$

510 Other LIF model parameters were set to the values used by Nicola et al. [23]. These include the  
511 action potential threshold (-40 mV), the reset potential (-65 mV), the absolute refractory period  
512 (2 ms), and the constant bias current (-40 pA). The parameter values for the LIF and the quadratic  
513 integrate-and-fire (QIF) models are listed in SI Appendix, Table S1.

514 **Training details.** In this study, we only considered supervised learning tasks. A task-specific  
515 target signal ( $\mathbf{z}$ ) is used along with the rate RNN output ( $\mathbf{o}^{rate}$ ) to define the loss function ( $\mathcal{L}$ ),  
516 which our rate RNN model is trained to minimize. Throughout the study, we used the root mean  
517 squared error (RMSE) defined as

$$\mathcal{L} = \sqrt{\left(\sum_{t=1}^T (z(t) - o^{rate}(t))^2\right)} \quad (8)$$

518 where  $T$  is the total number of time points in a single trial.

519 In order to train the rate model to minimize the above loss function (Eq. 8), we employed  
520 Adaptive Moment Estimation (ADAM) stochastic gradient descent algorithm. The learning rate  
521 was set to 0.01, and the TensorFlow default values were used for the first and second moment  
522 decay rates. The gradient descent method was used to optimize the following parameters in the  
523 rate model: synaptic decay time constants ( $\tau^d$ ), recurrent connectivity matrix ( $W^{rate}$ ), and readout  
524 weights ( $W_{out}^{rate}$ ).

525 Here we describe the method to train synaptic decay time constants ( $\tau^d$ ) using backpropagation.  
526 First, the time constants are initialized with random values within the specified range:

$$\tau^d = \sigma(\mathcal{N}(0, 1)) \cdot \tau_{step} + \tau_{min}^d$$

527 where  $\sigma(\cdot)$  is the sigmoid function (identical to Eq. 6) used to constrain the time constants to  
528 be non-negative. The time constant values are also bounded by the minimum ( $\tau_{min}^d$ ) and the  
529 maximum ( $\tau_{max}^d = \tau_{min}^d + \tau_{step}$ ) values. The error computed from the loss function (Eq. 8) is then  
530 backpropagated to update the time constants at each iteration:

$$\frac{\partial \mathcal{L}}{\partial \tau^d} = \frac{\partial \mathcal{L}}{\partial \mathbf{r}} \cdot \frac{\partial \mathbf{r}}{\partial \mathbf{x}} \cdot \frac{\partial \mathbf{x}}{\partial \tau^d}$$

531 The method proposed by Song et al. [13] was used to impose Dale's principle and create separate  
532 excitatory and inhibitory populations. Briefly, the recurrent connectivity matrix ( $W^{rate}$ ) in the  
533 rate model is parametrized by

$$W^{rate} = [W^{rate}]_+ \cdot D \quad (9)$$

534 where the rectified linear operation ( $[\cdot]_+$ ) is applied to the connectivity matrix at each update step.  
535 The diagonal matrix ( $D \in \mathbb{R}^{N \times N}$ ) contains +1's for excitatory units and -1's for inhibitory units in  
536 the network. Each unit in the network is randomly assigned to one group (excitatory or inhibitory)  
537 before training, and the assignment does not change during training (i.e.  $D$  stays fixed).

538 To impose specific connectivity patterns, we apply a binary mask ( $M \in \mathbb{R}^{N \times N}$ ) to Eq. 9:

$$W^{rate} = ([W^{rate}]_+ \cdot D) \odot M$$

539 where  $\odot$  refers to the Hadamard operation (elementwise multiplication). Similar to the diagonal  
540 matrix ( $D$ ), the mask matrix stays fixed throughout training. For example, the following mask  
541 matrix can be used to create a subgroup of inhibitory units (Group A) that do not receive synaptic  
542 inputs from the rest of the inhibitory units (Group B) in the network (Fig. S3):

$$m_{ij} = \begin{cases} 0 & i \in \text{Group A}, j \in \text{Group B} \\ 1 & \text{otherwise} \end{cases}$$

543 where  $m_{ij} \in M$  establishes (if  $m_{ij} = 1$ ) or removes (if  $m_{ij} = 0$ ) the connection from unit  $j$  to unit  
544  $i$ .

545 **Transfer learning from a rate model to a spiking model.** In this section, we describe the  
546 method that we developed to perform transfer learning from a trained rate model to a LIF model.  
547 Once the rate RNN model is trained using the gradient descent method, the rate model parameters  
548 are transferred to a LIF network in a one-to-one manner. First, the LIF network is initialized to  
549 have the same topology as the trained rate RNN. Next, the input weight matrix ( $W_{in}$ ) and the  
550 synaptic decay time constants ( $\tau^d$ ) are transferred to the spiking RNN without any modification.  
551 Lastly, the recurrent connectivity matrix ( $W^{rate}$ ) and the readout weights ( $W_{out}^{rate}$ ) are scaled by a  
552 constant number,  $\lambda$ , and transferred to the spiking network.

553 If the recurrent connectivity weights from the trained rate model are transferred to a spiking  
554 network without any changes, the spiking model produces largely fluctuating signals (as illustrated  
555 in Fig. 2B), because the LIF firing rates are significantly larger than 1 (whereas the firing rates of  
556 the rate model are constrained to range between zero and one by the sigmoid transfer function).

557 To place the spiking RNN in the similar dynamic regime as the rate network, we first assume  
558 a linear relationship between the rate model connectivity weights and the spike model weights:

$$W^{spk} = \lambda \cdot W^{rate}$$

559 Using the above assumption, the synaptic drive ( $d$ ) that unit  $i$  in the LIF RNN receives can be  
 560 expressed as

$$\begin{aligned} d_i^{spk}(t) &= \sum_{j=1}^N w_{ij}^{spk} \cdot r_j^{spk}(t) \\ &\approx \sum_{j=1}^N (\lambda \cdot w_{ij}^{rate}) \cdot r_j^{spk}(t) \\ &= \sum_{j=1}^N w_{ij}^{rate} \cdot (\lambda \cdot r_j^{spk}(t)) \end{aligned} \quad (10)$$

561 where  $w_{ij}^{spk} \in W^{spk}$  is the synaptic weight from unit  $j$  to unit  $i$ .

562 Similarly, unit  $i$  in the rate RNN model receives the following synaptic drive at time  $t$ :

$$d_i^{rate}(t) = \sum_{j=1}^N w_{ij}^{rate} \cdot r_j^{rate}(t) \quad (11)$$

563 If we set the above two synaptic drives (Eq. 10 and Eq. 11) equal to each other, we have:

$$\begin{aligned} d_i^{spk}(t) &= d_i^{rate}(t) \\ \sum_{j=1}^N w_{ij}^{rate} \cdot (\lambda \cdot r_j^{spk}(t)) &= \sum_{j=1}^N w_{ij}^{rate} \cdot r_j^{rate}(t) \end{aligned} \quad (12)$$

564 Generalizing Eq. 12 to all the units in the network, we have

$$\mathbf{r}^{rate}(t) = \lambda \cdot \mathbf{r}^{spk}(t)$$

565 Therefore, if there exists a constant factor ( $\lambda$ ) that can account for the firing rate scale difference  
 566 between the rate and the spiking models, the connectivity weights from the rate model ( $W^{rate}$ )  
 567 can be scaled by the factor and transferred to the spiking model.

568 The readout weights from the rate model ( $W_{out}^{rate}$ ) are also scaled by the same constant factor  
 569 ( $\lambda$ ) to have the spiking network produce output signals similar to the ones from the trained rate  
 570 model:

$$\begin{aligned} o^{rate}(t) &= W_{out}^{rate} \cdot \mathbf{r}^{rate}(t) \\ &\approx W_{out}^{rate} \cdot (\lambda \cdot \mathbf{r}^{spk}(t)) \\ &= (\lambda \cdot W_{out}^{rate}) \cdot \mathbf{r}^{spk}(t) = o^{spk}(t) \end{aligned}$$

571 In order to find the optimal scaling factor, we developed a simple grid search algorithm. For a  
 572 given range of values for  $1/\lambda$  (ranged from 20 to 75 with a step size of 5), the algorithm finds the  
 573 optimal value that maximizes the task performance.

574 **Implementation of computational tasks and figure details.** In this section, we describe the  
575 details of the parameters and methods used to generate all the main figures in the present study.

576 **Fig. 1.** A rate RNN of  $N = 200$  units (169 excitatory and 31 inhibitory units) was trained to  
577 perform the Go-NoGo task for Fig. 1B. Each trial lasted for 1000 ms (200 time steps with 5 ms  
578 step size). The minimum and the maximum synaptic decay time constants were set to 20 ms and  
579 50 ms, respectively. An input stimulus with a pulse 125 ms in duration was given for a Go trial,  
580 while no input stimulus was given for a NoGo trial. The network was trained to produce an output  
581 signal approaching +1 after the stimulus offset for a Go trial. For a NoGo trial, the network was  
582 trained to maintain its output at zero. A trial was considered correct if the maximum output signal  
583 during the response window was above 0.7 for the Go trial type. For a NoGo trial, if the maximum  
584 response value was less than 0.3, the trial was considered correct. For training, 6000 trials were  
585 randomly generated, and the model performance was evaluated after every 100 trials. Training  
586 was terminated when the loss function value fell below 7 and the task performance reached at least  
587 95%. The termination criteria were usually met at or before 2000 trials for this task.

588 For Fig. 1C, rate RNNs with 9 different sizes ( $N = 10, 50, 100, 150, 200, 250, 300, 350, 400$ ) were  
589 trained. For each network size, 100 rate RNNs with random initial conditions were trained on the  
590 Go-NoGo task.

591 **Fig. 2.** The rate RNN trained in Fig. 1B was converted to a LIF RNN using different scaling  
592 factor ( $\lambda$ ) values for Fig. 2B. The double exponential synaptic filter was used, and the gain term  
593 ( $g$ ) for the rate RNN initialization was set to 1.5. The LIF parameters listed in Table S1 were used  
594 for all the LIF network models constructed in Fig. 2.

595 **Fig. 3.** Rate RNNs with 11 different network sizes ( $N = 10, 50, 100, 150, 200, 250, 300, 350, 400, 450, 500$ )  
596 were trained on the contextual integration task. For each network size, 100 rate RNNs with random  
597 initial conditions were trained.

598 For the task design, the input matrix ( $\mathbf{u} \in \mathbb{R}^{4 \times 500}$ ) contained four stimuli channels across time  
599 (500 time steps with 5 ms step size). The first two channels corresponded to the modality 1 and  
600 modality 2 noisy input signals. These signals were modeled as white-noise signals (sampled from  
601 the standard normal distribution) with constant offset terms. The sign of the offset term modeled  
602 the evidence toward (+) or (-) choices, while the magnitude of the offset determined the strength of  
603 the evidence. The noisy signals were only present during the stimulus window (250 ms – 1250 ms).  
604 The last two channels of  $\mathbf{u}$  represented the modality 1 and the modality 2 context signals. For

605 instance, the third channel of  $\mathbf{u}$  is set to one and the fourth channel is set to zero throughout the  
606 trial duration to model Modality 1 context.

607 For each trial used to train the rate model, the offset values for the two modality input signals  
608 were randomly set to -0.5 or +0.5. The context signals were randomly set such that either modality  
609 1 (third input channel is set to 1) or modality 2 (fourth input channel is set to 1) was cued for  
610 each trial. If the offset term of the cued modality was +0.5 (or -0.5) for a given trial, the network  
611 was instructed to produce an output signal approaching +1 (or -1) after the stimulus window.  
612 The model performance was assessed after every 100 training trials, and the training termination  
613 conditions were same as the ones used for Fig. 1.

614 **Fig. 4.** A network of  $N = 250$  LIF units (188 excitatory and 62 inhibitory units) were constructed  
615 from a rate RNN model trained to perform the context-dependent input integration task for Fig. 4A.  
616 The scaling factor ( $\lambda$ ) was set to  $1/60$ . The double exponential synaptic filter was used, and the  
617 gain term ( $g$ ) for the rate RNN initialization was set to 1.5. The LIF parameters listed in Table S1  
618 were used for all the LIF network models constructed in Fig. 4.

619 **Fig. 5.** Rate RNNs ( $N = 250$ ) were trained on the Go-NoGo task with and without optimizing  
620 the synaptic decay time constants ( $\tau^d$ ). For each condition, 100 rate RNNs were trained. For  
621 the fixed synaptic decay constant condition,  $\tau^d$  was fixed to 35 ms. For the tuned synaptic decay  
622 condition,  $\tau_{min}^d = 20$  ms and  $\tau_{max}^d = 50$  ms.

623 **Fig. 6.** For Fig. 6A, all 100 rate RNNs ( $N = 250$ ,  $\tau_{min}^d = 20$  ms,  $\tau_{max}^d = 100$  ms) trained in  
624 Fig. 4E were converted to LIF RNNs with different values of the refractory period. The following  
625 20 refractory period values were considered: 0, 0.5, 1.0, 1.5, 2.0, 2.5, 3.0, 3.5, 4.0, 4.5, 5.0, 10, 15,  
626 20, 25, 30, 35, 40, 45, 50 ms.

627 **Fig. 7.** The following softplus function was used:

$$r = \log(\exp(x) + 1)$$

628 For the networks trained with the softplus and ReLU activation functions, the following range  
629 of values for  $1/\lambda$  was used for the grid search: 4 to 26 with a step size of 2.

630 **Quadratic integrate-and-fire model.** For the quadratic integrate-and-fire (QIF) model (Fig. S7),  
631 we considered a network of units governed by

$$\tau_m \frac{dv}{dt} = v^2 + W^{spk} r^{spk} + \mathbf{I}_{ext}$$

632 The definitions of the variables are identical to the ones used for the LIF network model.

### 633 **Code availability**

634 The implementation of our framework and the codes to generate all the figures in this work are  
635 available at <https://github.com/rkim35/spikeRNN>. The repository also contains implementation  
636 of other tasks including autonomous oscillation and exclusive OR (XOR) tasks.

### 637 **Data availability**

638 All the trained models used in the present study are available from the corresponding authors upon  
639 reasonable request.



## Supplementary Figures

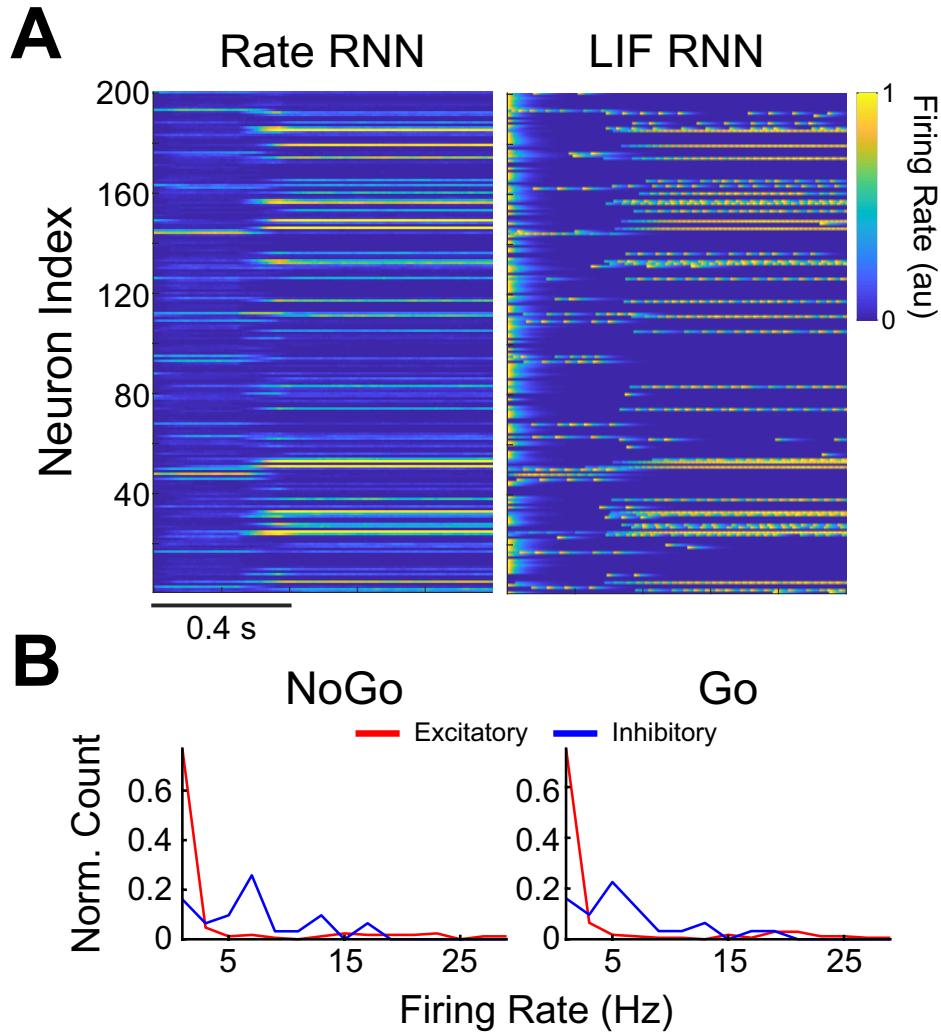

**Supplementary Fig. 1 | Comparison of the time-varying rates of the continuous-variable rate units and the LIF units. A.** A single Go trial was used to extract the rates from the rate RNN trained in Fig. 1B. The firing rates of the LIF RNN constructed using the optimal scaling factor ( $\lambda = 1/25$ ) are shown on the right. The firing rates of the LIF units were normalized to range from 0 to 1 for comparison. **B.** Distribution of the firing rates for a NoGo trial (left) and a Go trial (right).

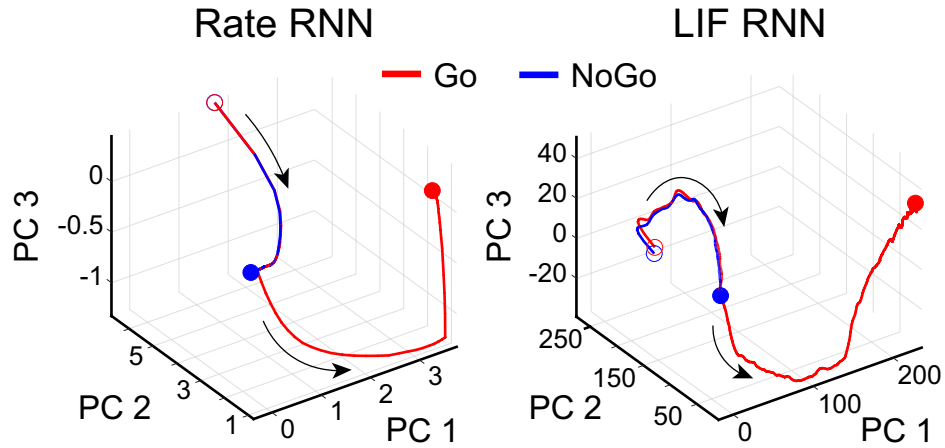

**Supplementary Fig. 2 | Comparison of the top three PCs extracted from the network activities of the rate and LIF RNNs trained to perform the Go-NoGo task.** Principal component analysis (PCA) was performed on the firing rates derived from a rate RNN and a LIF RNN trained to perform the Go-NoGo task. The rate RNN contained 200 units (169 excitatory and 31 inhibitory units), and the LIF model was constructed from the rate model. The firing rates from 50 Go trials and 50 NoGo trials were obtained from the two RNN models. For both models, the top three principal components (PCs) captured 99% of the variance. Red and blue empty circles indicate the trial onset for the Go and the NoGo trials, respectively. Red and blue filled circles represent the end of the trial for the Go and the NoGo trials, respectively.

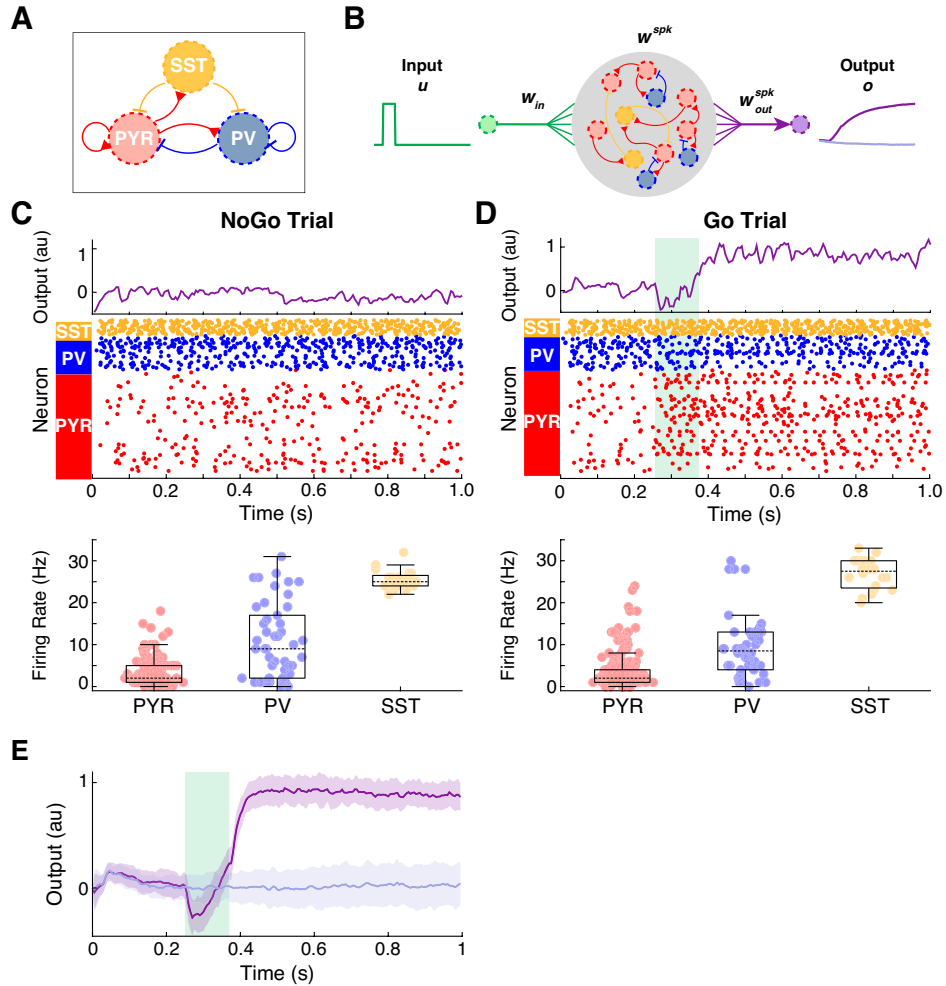

**Supplementary Fig. 3 | Incorporation of additional functional connectivity constraints.** **A.** Common cortical microcircuit motif where somatostatin-expressing interneurons (SST; yellow circle) inhibit both pyramidal (PYR; red circle) and parvalbumin-expressing (PV; blue circle) neurons. **B.** Schematic illustrating the incorporation of the connectivity motif shown in **A** into a LIF network model. The connectivity pattern was imposed during training of a rate network model ( $N = 200$ ) to perform the Go-NoGo task. There were 134 PYR, 46 PV, and 20 SST units. A spiking model was constructed using the trained rate model with  $\lambda = 1/50$ . **C.** Example output response and spikes from the LIF network model for a single NoGo trial. Mean  $\pm$  SD firing rate for each population is also shown (PYR,  $3.08 \pm 3.29$  Hz; PV,  $10.80 \pm 8.94$  Hz; SST,  $25.50 \pm 2.33$  Hz). **D.** Example output response and spikes from the LIF network model for a single Go trial. Mean  $\pm$  SD firing rate for each population is also shown (PYR,  $4.72 \pm 5.89$  Hz; PV,  $9.30 \pm 8.16$  Hz; SST,  $27.05 \pm 3.98$  Hz). Box plot central lines, median; bottom and top edges, lower and upper quartiles. **E.** LIF network model performance on 50 NoGo trials (light purple) and 50 Go trials (dark purple). Mean  $\pm$  SD shown.

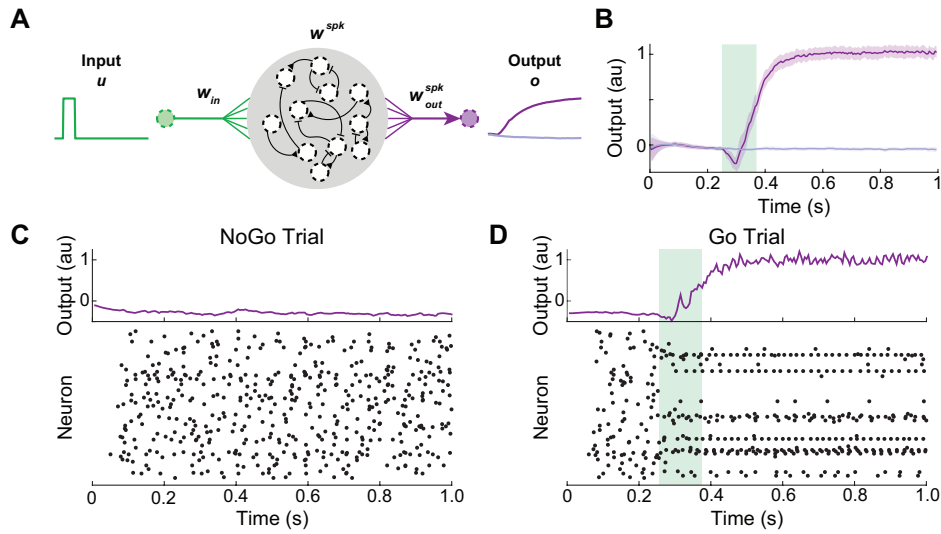

**Supplementary Fig. 4 | Dale's principle constraint can be relaxed.** **A.** Schematic diagram showing a LIF network model without Dale's principle. A rate RNN model ( $N = 200$ ) without Dale's principle was first trained to perform the Go-NoGo task. The scaling factor ( $\lambda$ ) was set to  $1/50$ . Note that each unit (black dotted circles) can exert both excitatory and inhibitory effects. **B.** LIF network model performance on 50 NoGo trials (light purple) and 50 Go trials (dark purple). Mean  $\pm$  SD shown. **C.** Example output response (top) and spikes (bottom) from the LIF network model for a single NoGo trial. **D.** Example output response (top) and spikes (bottom) from the LIF network model for a single Go trial.

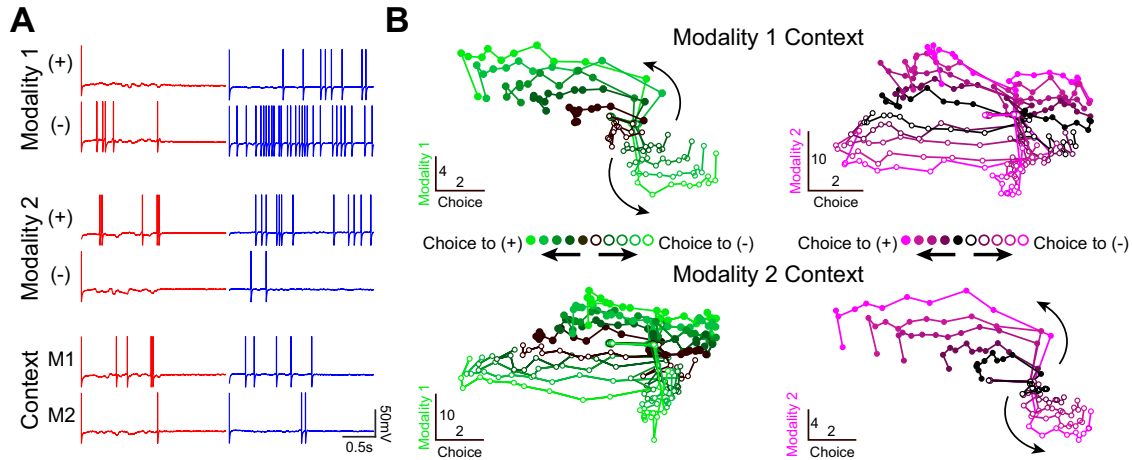

**Supplementary Fig. 5 | The LIF network model employs mixed representations of the task variables.** **A.** Mixed representation of the task variables at the level of single units from a LIF network ( $N = 400$ ; 299 excitatory and 101 inhibitory units;  $\tau_{min}^d = 20$  ms and  $\tau_{max}^d = 100$  ms). An excitatory unit (red) and an inhibitory unit (blue) with mixed representation of three task variables (modality 1, modality 2, and context) are shown as examples. The excitatory neuron preferred modality 1 input signals with negative offset values, modality 2 signals with positive offset values, and modality 1 context (left column). The inhibitory neuron also exhibited similar biases (right column). **B.** Average population responses projected to a low dimensional state space. The targeted dimensionality reduction technique (developed in [7]) was used to project the population activities to the state space spanned by the task-related axes. For the modality 1 context (top row), the population responses from the trials with various modality 1 offset values were projected to the choice and modality 1 axes (left). The same trials were sorted by the irrelevant modality (modality 2) and shown on the right. Similar conventions used for the modality 2 context (bottom row). The offset magnitude (i.e. amount of evidence toward “+” or “-” choice) increases from dark to light. Filled and empty circles correspond to “+” choice and “-” choice trials, respectively.

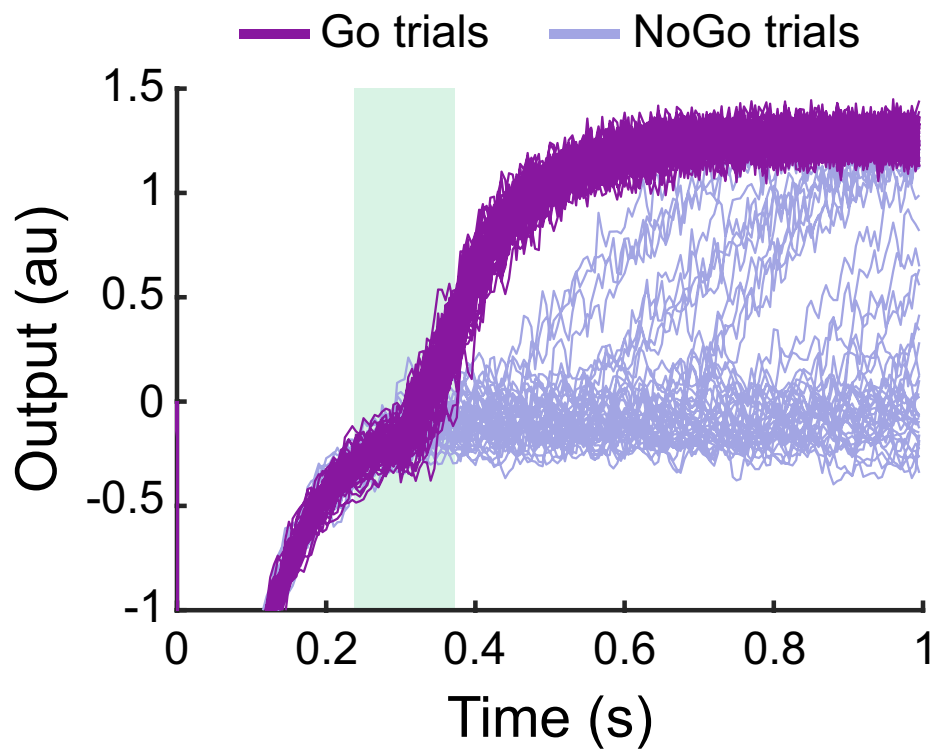

**Supplementary Fig. 6 | Example output responses from a softplus LIF RNN constructed to perform the Go-NoGo task.** Individual output responses from 50 Go trials (dark purple) and 50 NoGo trials (light purple) are shown. The optimal scaling factor was 1/10, and the performance of the model was 78%.

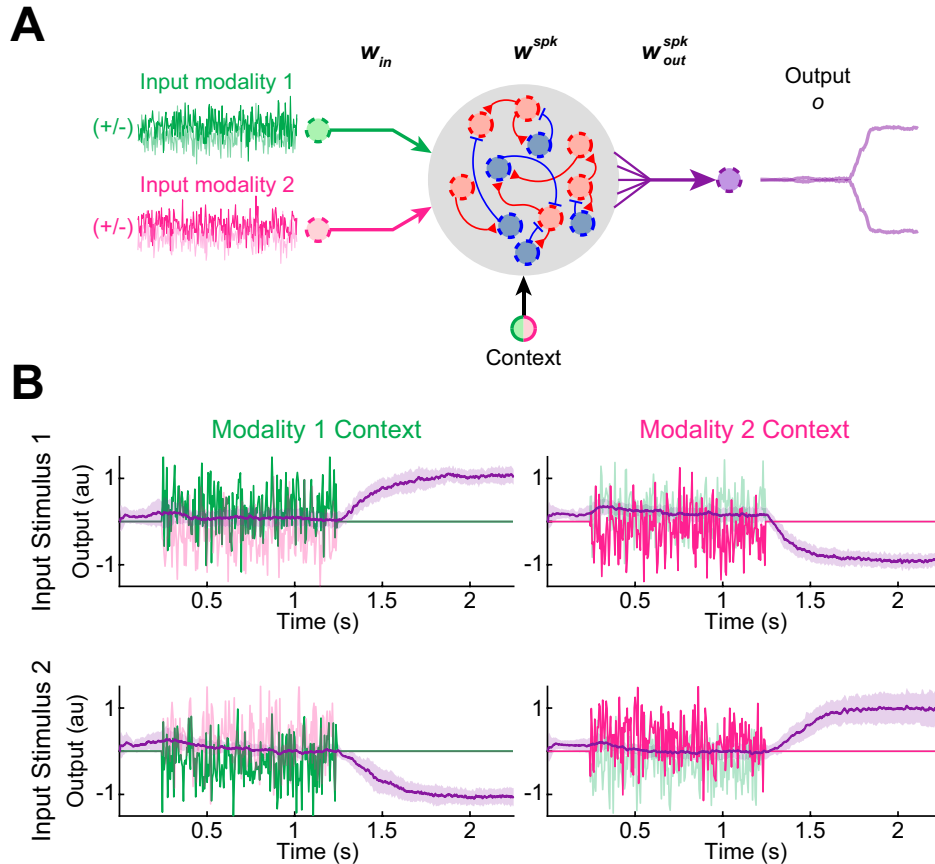

**Supplementary Fig. 7 | Quadratic integrate-and-fire (QIF) model constructed to perform the context-dependent input integration task. A.** The task paradigm and the trained rate network model used for Fig. S5 were employed to build a QIF model. The QIF model parameter values are listed in Table S1. **B.** The QIF model successfully performed the task by integrating cued modality input signals. Example noisy input signals (scaled by 0.5 vertically for visualization; green and magenta lines) from a single trial are shown. Mean  $\pm$  SD response signals (purple lines) across 50 trials for each trial type.



## Supplementary Notes

For the quadratic integrate-and-fire (QIF) model (Supplementary Fig. 7), we considered a network of units governed by

$$\tau_m \frac{dv}{dt} = v^2 + W^{spk} r^{spk} + I_{ext}$$

The definitions of the variables are identical to the ones used for the LIF network model.

## Supplementary Table

|                                     | LIF    | QIF    |
|-------------------------------------|--------|--------|
| Membrane time constant ( $\tau_m$ ) | 10 ms  | 10 ms  |
| Absolute refractory period          | 2 ms   | 2 ms   |
| Synaptic rise time ( $\tau_r$ )     | 2 ms   | 2 ms   |
| Constant bias current               | -40 pA | 0 pA   |
| Spike threshold                     | -40 mV | 30 mV  |
| Spike reset voltage                 | -65 mV | -65 mV |

**Supplementary Table 1** | Parameter values used to construct LIF and QIF networks.
